# Supplementary material
Source: Springer Nature journal article supplement (https://www.springermedizin.de/resource/supplementary/12916_2010_353_MOESM2_ESM.pdf/9599850)

**A**

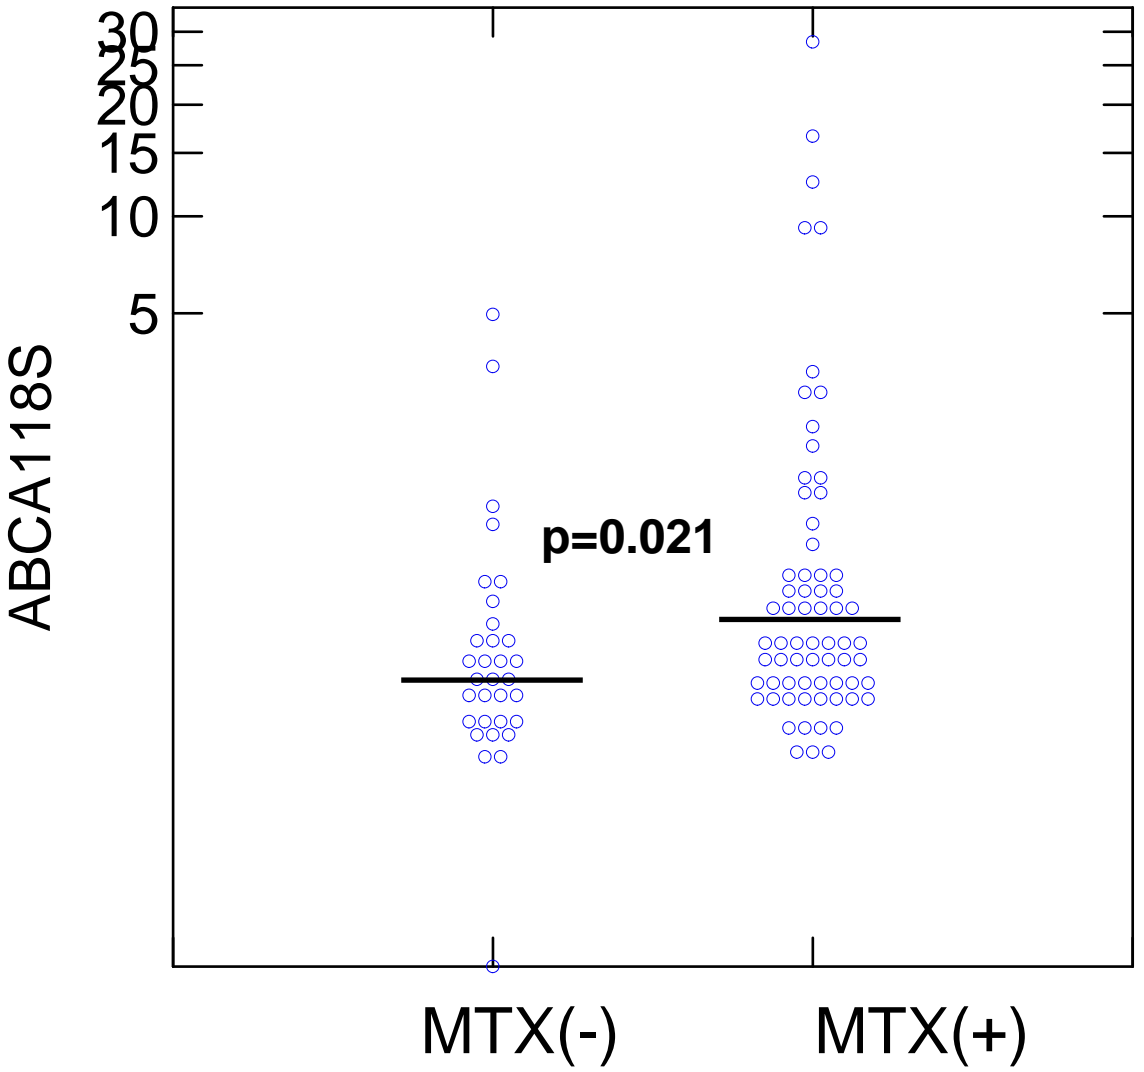

**B**

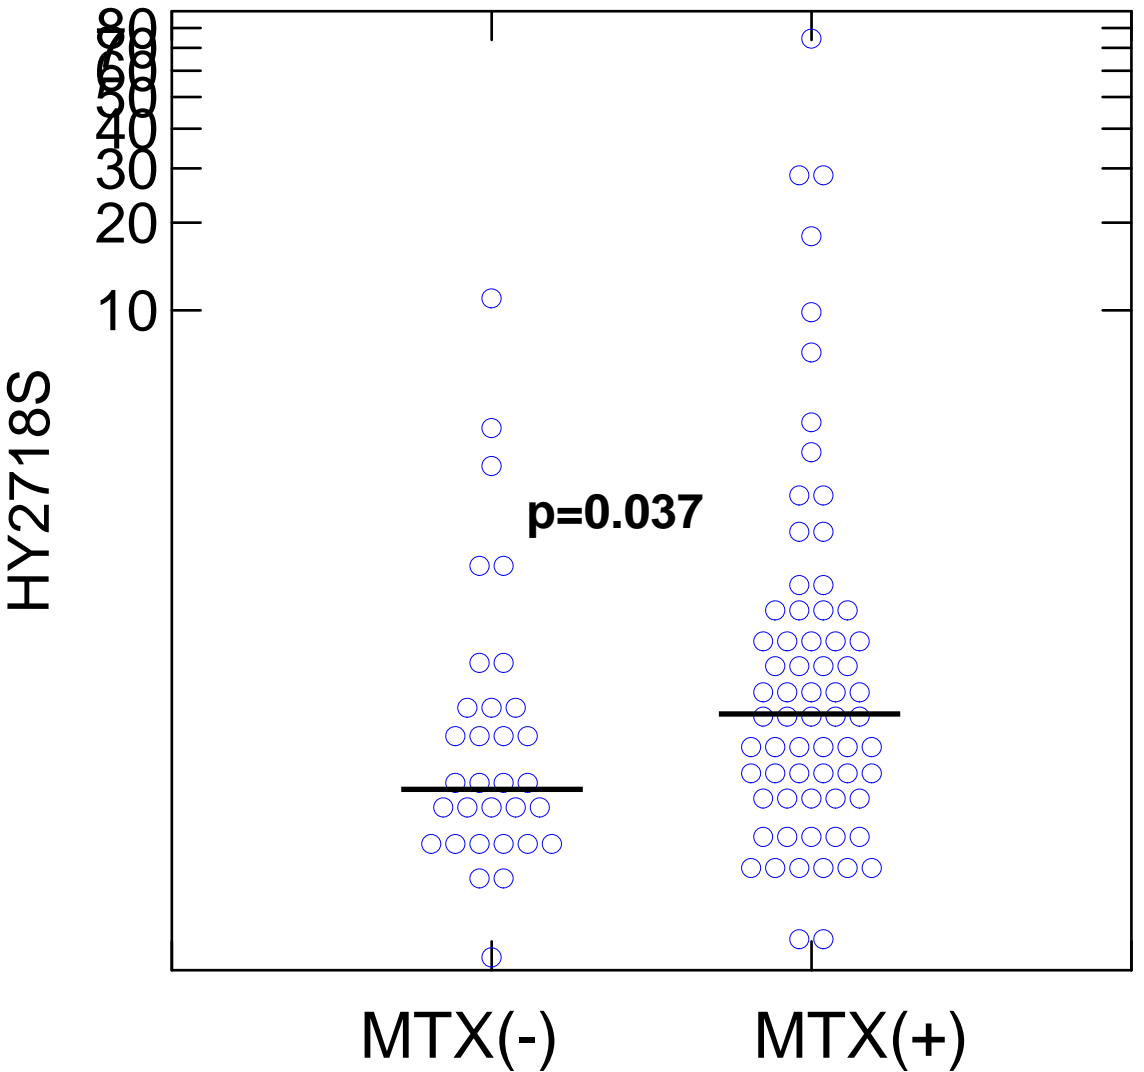

Supplement: MOESM2 [file 9599850]
